# Supplementary material for: COVID-19 Vaccine Effectiveness in Autumn and Winter 2022 to 2023 Among Older Europeans
Source: PubMed Central journal article supplement (PMC11217869; doi:10.1001/jamanetworkopen.2024.19258), 2024-07-01
Supplement: jamanetwopen-e2419258-s001.pdf [file jamanetwopen-e2419258-s001.pdf]

## Supplemental Online Content

Laniece Delaunay C, Mazagatos C, Martínez-Baz I, et al; for the VEBIS Primary Care Vaccine Effectiveness Group. COVID-19 vaccine effectiveness in autumn and winter 2022 to 2023 among older Europeans. *JAMA Netw Open*. 2024;7(7):e2419258. doi:10.1001/jamanetworkopen.2024.19258

**eTable 1.** Study Site-Specific COVID-19 Case Definition, VEBIS Primary Care Study, Europe, September 2022–August 2023

**eTable 2.** Start Date of the Autumn/Winter 2022/23 COVID-19 Vaccination Campaign by Study Site, VEBIS Primary Care Study, Europe, September 2022–August 2023

**eTable 3.** Effectiveness of COVID-19 Vaccines Administered in the Autumn/Winter 2022/23 Against Infection With SARS-CoV-2 Variants Circulating Between September 2022 and August 2023, Among Adults Aged 60 Years and Above, VEBIS Primary Care Study, Europe

**eTable 4.** Effectiveness of COVID-19 Vaccines Administered in the Autumn/Winter 2022/23 Against Infection With SARS-CoV-2 Variants Circulating Between September 2022 and August 2023, Among Adults Aged 60 Years and Above, Excluding Unexposed Patients Vaccinated in the 3 Months Prior to the Start of the Campaign, VEBIS Primary Care Study, Europe

**eTable 5.** Effectiveness of COVID-19 Vaccines Administered in the Autumn/Winter 2022/23 Against Infection With SARS-CoV-2 Variants Circulating Between September 2022 and August 2023, Among Adults Aged 60 Years and Above, Excluding Unexposed Patients Vaccinated in the 3 Months Prior to Symptom Onset, VEBIS Primary Care Study, Europe

**eTable 6.** Effectiveness of COVID-19 Vaccines Administered in the Autumn/Winter 2022/23 Against Infection With SARS-CoV-2 Variants Circulating Between September 2022 and August 2023, Among Adults Aged 60 Years and Above, Excluding Unexposed Patients Vaccinated in the 6 Months Prior to Symptom Onset, VEBIS Primary Care Study, Europe

This supplemental material has been provided by the authors to give readers additional information about their work.

**eTable 1. Study site-specific COVID-19 case definition, VEBIS primary care study, Europe, September 2022–August 2023**

| Study site            | COVID-19 case definition                                                                                                                                                                                                                                                    | COVID-19 vaccination information                                                              |
|-----------------------|-----------------------------------------------------------------------------------------------------------------------------------------------------------------------------------------------------------------------------------------------------------------------------|-----------------------------------------------------------------------------------------------|
| Croatia               | EU acute respiratory infection (ARI) case definition: sudden onset of symptoms and at least one of the four respiratory symptoms (cough, sore throat, shortness of breath or coryza) and a clinician's judgment that the illness is due to an infection                     | Depending on GP and region: Medical records, vaccination registry, GP interview (self-report) |
| France                | Sudden onset of fever (or feverishness) and respiratory symptoms                                                                                                                                                                                                            | GP interview (self-report)                                                                    |
| Germany               | At least one of the following symptoms: fever, cough, sore throat or nasal congestion                                                                                                                                                                                       | GP interview (self-report)                                                                    |
| Hungary               | EU ARI case definition                                                                                                                                                                                                                                                      | Medical records, GP interview (self-report)                                                   |
| Ireland               | EU ARI case definition                                                                                                                                                                                                                                                      | Data linkage to vaccine registry                                                              |
| The Netherlands       | EU ARI case definition                                                                                                                                                                                                                                                      | GP interview (self-report)                                                                    |
| Portugal              | EU ARI case definition                                                                                                                                                                                                                                                      | Vaccine registry look-up by GPs                                                               |
| Romania               | EU ARI case definition                                                                                                                                                                                                                                                      | Medical records, GP interview (self-report)                                                   |
| Sweden                | EU ARI case definition                                                                                                                                                                                                                                                      | Data linkage to vaccine registry as well as GP interview (self-report)                        |
| Spain, national       | EU ARI case definition                                                                                                                                                                                                                                                      | GP interview (self-report)                                                                    |
| Spain, Navarre region | EU influenza-like illness (ILI) case definition: sudden onset of symptoms and at least one of the four systemic symptoms (fever or feverishness, malaise, headache or myalgia) and at least one of the three respiratory symptoms (cough, sore throat, shortness of breath) | Data linkage to vaccine registry                                                              |

**eTable 2. Start date of the autumn/winter 2022/23 COVID-19 vaccination campaign by study site, VEBIS primary care study, Europe, September 2022–August 2023**

| <b>Study site</b>     | <b>Start date of the autumn/winter 2022/23 COVID-19 vaccination campaign</b> |
|-----------------------|------------------------------------------------------------------------------|
| Croatia               | September 12, 2022                                                           |
| France                | October 3, 2022                                                              |
| Germany               | October 6, 2022                                                              |
| Hungary               | September 1, 2022                                                            |
| Ireland               | September 15, 2022                                                           |
| The Netherlands       | September 19, 2022                                                           |
| Portugal              | September 7, 2022                                                            |
| Romania               | November 25, 2022                                                            |
| Sweden                | September 5, 2022                                                            |
| Spain, national       | September 26, 2022                                                           |
| Spain, Navarre region | September 26, 2022                                                           |

**eTable 3. Effectiveness of COVID-19 vaccines administered in the autumn/winter 2022/23 against infection with SARS-CoV-2 variants circulating between September 2022 and August 2023, among adults aged 60 years and above, VEBIS primary care study, Europe**

| Estimate                                 | Time since vaccination (days) | CVE (95% CI) (%)  | N     | Cases vacc | Cases unvacc | Controls vacc | Controls unvacc |
|------------------------------------------|-------------------------------|-------------------|-------|------------|--------------|---------------|-----------------|
| <b>September 2022–August 2023</b>        |                               |                   |       |            |              |               |                 |
| <b>Seasonal</b>                          | 14–89                         | 29 (14 to 42)     | 6,290 | 168        | 941          | 1,381         | 3,800           |
|                                          | 90–179                        | 16 (-4 to 33)     | 6,045 | 174        | 941          | 1,130         | 3,800           |
|                                          | 180–269                       | -17 (-49 to 8)    | 5,442 | 187        | 941          | 514           | 3,800           |
|                                          | 270–359                       | -73 (-171 to -10) | 4,879 | 72         | 941          | 66            | 3,800           |
| <b>Absolute</b>                          | 14–89                         | 39 (6 to 60)      | 1,867 | 168        | 82           | 1,381         | 236             |
|                                          | 90–179                        | 26 (-16 to 52)    | 1,622 | 174        | 82           | 1,130         | 236             |
|                                          | 180–269                       | -84 (-245 to -3)  | 1,019 | 187        | 82           | 514           | 236             |
|                                          | 270–359                       | NA                | 456   | 72         | 82           | 66            | 236             |
| <b>Relative</b>                          | 14–89                         | 31 (15 to 44)     | 5,927 | 168        | 846          | 1,381         | 3,532           |
|                                          | 90–179                        | 16 (-4 to 33)     | 5,682 | 174        | 846          | 1,381         | 3,532           |
|                                          | 180–269                       | -17 (-51 to 9)    | 5,079 | 187        | 846          | 514           | 3,532           |
|                                          | 270–359                       | -63 (-160 to -3)  | 4,516 | 72         | 846          | 66            | 3,532           |
| <b>Relative (2<sup>nd</sup> booster)</b> | 14–89                         | 34 (18 to 47)     | 4,946 | 143        | 700          | 1,200         | 2,903           |
|                                          | 90–179                        | 19 (-3 to 37)     | 4,763 | 150        | 700          | 1,010         | 2,903           |
|                                          | 180–269                       | -14 (-48 to 13)   | 4,261 | 178        | 700          | 480           | 2,903           |
|                                          | 270–359                       | -46 (-141 to 11)  | 3,738 | 71         | 700          | 64            | 2,903           |
| <b>XBB-dominant</b>                      |                               |                   |       |            |              |               |                 |
| <b>Seasonal</b>                          | 14–89                         | 44 (-10 to 75)    | 1,309 | 9          | 268          | 81            | 951             |
|                                          | 90–179                        | 23 (0 to 41)      | 2,065 | 133        | 268          | 713           | 951             |
|                                          | 180–269                       | -23 (-59 to 5)    | 1,913 | 186        | 268          | 508           | 951             |
|                                          | 270–359                       | -91 (-207 to -20) | 1,357 | 72         | 268          | 66            | 951             |
| <b>Absolute</b>                          | 14–89                         | 52 (-23 to 82)    | 188   | 9          | 25           | 76            | 78              |
|                                          | 90–179                        | 39 (-11 to 65)    | 928   | 129        | 25           | 696           | 78              |
|                                          | 180–269                       | -59 (-199 to 12)  | 785   | 183        | 25           | 499           | 78              |
|                                          | 270–359                       | NA                | 240   | 72         | 25           | 65            | 78              |
| <b>Relative</b>                          | 14–89                         | 47 (-8 to 77)     | 1,165 | 8          | 233          | 81            | 843             |
|                                          | 90–179                        | 24 (0 to 42)      | 1,905 | 128        | 233          | 701           | 843             |
|                                          | 180–269                       | -22 (-59 to 6)    | 1,758 | 184        | 233          | 498           | 843             |
|                                          | 270–359                       | -82 (-196 to -13) | 1,213 | 72         | 233          | 65            | 843             |
| <b>Relative (2<sup>nd</sup> booster)</b> | 14–89                         | 46 (-13 to 77)    | 906   | 8          | 186          | 72            | 640             |
|                                          | 90–179                        | 25 (0 to 45)      | 1,588 | 117        | 186          | 645           | 640             |
|                                          | 180–269                       | -20 (-59 to 10)   | 1,469 | 174        | 186          | 469           | 640             |
|                                          | 270–359                       | -69 (-185 to 0)   | 961   | 71         | 186          | 64            | 640             |

CI: confidence interval; CVE: COVID-19 vaccine effectiveness; unvacc: unvaccinated; vacc: vaccinated.

All models are adjusted by age, sex, onset date, presence of commonly collected chronic conditions and study site.

**eTable 4. Effectiveness of COVID-19 vaccines administered in the autumn/winter 2022/23 against infection with SARS-CoV-2 variants circulating between September 2022 and August 2023, among adults aged 60 years and above, excluding unexposed patients vaccinated in the 3 months prior to the start of the campaign, VEBIS primary care study, Europe**

| Estimate                                 | Time since vaccination (days) | CVE (95% CI) (%)  | N     | Cases vacc | Cases unvacc | Controls vacc | Controls unvacc |
|------------------------------------------|-------------------------------|-------------------|-------|------------|--------------|---------------|-----------------|
| <b>September 2022–August 2023</b>        |                               |                   |       |            |              |               |                 |
| <b>Seasonal</b>                          | 14–89                         | 27 (11 to 40)     | 6,487 | 168        | 967          | 1,381         | 3,971           |
|                                          | 90–179                        | 15 (-5 to 32)     | 6,242 | 174        | 967          | 1,130         | 3,971           |
|                                          | 180–269                       | -16 (-48 to 9)    | 5,639 | 187        | 967          | 514           | 3,971           |
|                                          | 270–359                       | -76 (-175 to -12) | 5,076 | 72         | 967          | 66            | 3,971           |
| <b>Relative</b>                          | 14–89                         | 28 (12 to 42)     | 6,124 | 168        | 872          | 1,381         | 3,703           |
|                                          | 90–179                        | 15 (-6 to 32)     | 5,879 | 174        | 872          | 1,130         | 3,703           |
|                                          | 180–269                       | -16 (-49 to 9)    | 5,276 | 187        | 872          | 514           | 3,703           |
|                                          | 270–359                       | -66 (-163 to -5)  | 4,713 | 72         | 872          | 66            | 3,703           |
| <b>Relative (2<sup>nd</sup> booster)</b> | 14–89                         | 32 (15 to 45)     | 5,061 | 149        | 713          | 1,228         | 2,971           |
|                                          | 90–179                        | 21 (-1 to 38)     | 4,859 | 151        | 713          | 1,024         | 2,971           |
|                                          | 180–269                       | -10 (-44 to 15)   | 4,349 | 179        | 713          | 486           | 2,971           |
|                                          | 270–359                       | -43 (-135 to 13)  | 3,819 | 71         | 713          | 64            | 2,971           |
| <b>XBB-dominant</b>                      |                               |                   |       |            |              |               |                 |
| <b>Seasonal</b>                          | 14–89                         | 46 (-7 to 75)     | 1,355 | 9          | 278          | 81            | 987             |
|                                          | 90–179                        | 22 (-1 to 40)     | 2,111 | 133        | 278          | 713           | 987             |
|                                          | 180–269                       | -22 (-57 to 5)    | 1,959 | 186        | 278          | 508           | 987             |
|                                          | 270–359                       | -92 (-208 to -21) | 1,403 | 72         | 278          | 66            | 987             |
| <b>Relative</b>                          | 14–89                         | 41 (-18 to 74)    | 1,220 | 9          | 244          | 81            | 886             |
|                                          | 90–179                        | 22 (-3 to 40)     | 1,976 | 133        | 244          | 713           | 886             |
|                                          | 180–269                       | -22 (-59 to 6)    | 1,824 | 186        | 244          | 508           | 886             |
|                                          | 270–359                       | -80 (-191 to -12) | 1,268 | 72         | 244          | 66            | 886             |
| <b>Relative (2<sup>nd</sup> booster)</b> | 14–89                         | 44 (-16 to 76)    | 921   | 8          | 192          | 72            | 649             |
|                                          | 90–179                        | 26 (0 to 44)      | 1,603 | 117        | 192          | 645           | 649             |
|                                          | 180–269                       | -17 (-55 to 12)   | 1,484 | 174        | 192          | 469           | 649             |
|                                          | 270–359                       | -65 (-178 to 2)   | 976   | 71         | 192          | 64            | 649             |

CI: confidence interval; CVE: COVID-19 vaccine effectiveness; unvacc: unvaccinated; vacc: vaccinated.

All models are adjusted by age, sex, onset date, presence of commonly collected chronic conditions and study site.

**eTable 5. Effectiveness of COVID-19 vaccines administered in the autumn/winter 2022/23 against infection with SARS-CoV-2 variants circulating between September 2022 and August 2023, among adults aged 60 years and above, excluding unexposed patients vaccinated in the 3 months prior to symptom onset, VEBIS primary care study, Europe**

| Estimate                                 | Time since vaccination (days) | CVE (95% CI) (%)  | N     | Cases vacc | Cases unvacc | Controls vacc | Controls unvacc |
|------------------------------------------|-------------------------------|-------------------|-------|------------|--------------|---------------|-----------------|
| <b>September 2022–August 2023</b>        |                               |                   |       |            |              |               |                 |
| <b>Seasonal</b>                          | 14–89                         | 26 (10 to 39)     | 6,657 | 168        | 988          | 1,381         | 4,120           |
|                                          | 90–179                        | 15 (-6 to 31)     | 6,412 | 174        | 988          | 1,130         | 4,120           |
|                                          | 180–269                       | -16 (-48 to 8)    | 5,809 | 187        | 988          | 514           | 4,120           |
|                                          | 270–359                       | -74 (-172 to -12) | 5,246 | 72         | 988          | 66            | 4,120           |
| <b>Relative</b>                          | 14–89                         | 27 (11 to 40)     | 6,294 | 168        | 893          | 1,381         | 3,852           |
|                                          | 90–179                        | 14 (-6 to 31)     | 6,049 | 174        | 893          | 1,130         | 3,852           |
|                                          | 180–269                       | -16 (-48 to 9)    | 5,446 | 187        | 893          | 514           | 3,852           |
|                                          | 270–359                       | -65 (-160 to -4)  | 4,883 | 72         | 893          | 66            | 3,852           |
| <b>Relative (2<sup>nd</sup> booster)</b> | 14–89                         | 31 (15 to 45)     | 5,102 | 149        | 721          | 1,228         | 3,004           |
|                                          | 90–179                        | 21 (0 to 38)      | 4,900 | 151        | 721          | 1,024         | 3,004           |
|                                          | 180–269                       | -9 (-41 to 16)    | 4,390 | 179        | 721          | 486           | 3,004           |
|                                          | 270–359                       | -40 (-129 to 15)  | 3,860 | 71         | 721          | 64            | 3,004           |
| <b>XBB-dominant</b>                      |                               |                   |       |            |              |               |                 |
| <b>Seasonal</b>                          | 14–89                         | 44 (-10 to 75)    | 1,401 | 9          | 287          | 81            | 1,024           |
|                                          | 90–179                        | 22 (-1 to 40)     | 2,157 | 133        | 287          | 713           | 1,024           |
|                                          | 180–269                       | -23 (-59 to 4)    | 2,005 | 186        | 287          | 508           | 1,024           |
|                                          | 270–359                       | -93 (-208 to -21) | 1,449 | 72         | 287          | 66            | 1,024           |
| <b>Relative</b>                          | 14–89                         | 41 (-16 to 74)    | 1,266 | 9          | 253          | 81            | 923             |
|                                          | 90–179                        | 21 (-3 to 40)     | 2,022 | 133        | 253          | 713           | 923             |
|                                          | 180–269                       | -24 (-61 to 4)    | 1,870 | 186        | 253          | 508           | 923             |
|                                          | 270–359                       | -82 (-193 to -13) | 1,314 | 72         | 253          | 66            | 923             |
| <b>Relative (2<sup>nd</sup> booster)</b> | 14–89                         | 46 (-12 to 77)    | 931   | 8          | 197          | 72            | 654             |
|                                          | 90–179                        | 27 (2 to 46)      | 1,613 | 117        | 197          | 645           | 654             |
|                                          | 180–269                       | -16 (-53 to 12)   | 1,494 | 174        | 197          | 469           | 654             |
|                                          | 270–359                       | -60 (-169 to 4)   | 986   | 71         | 197          | 64            | 654             |

*CI: confidence interval; CVE: COVID-19 vaccine effectiveness; unvacc: unvaccinated; vacc: vaccinated. All models are adjusted by age, sex, onset date, presence of commonly collected chronic conditions and study site.*

**eTable 6. Effectiveness of COVID-19 vaccines administered in the autumn/winter 2022/23 against infection with SARS-CoV-2 variants circulating between September 2022 and August 2023, among adults aged 60 years and above, excluding unexposed patients vaccinated in the 6 months prior to symptom onset, VEBIS primary care study, Europe**

| Estimate                                 | Time since vaccination (days) | CVE (95% CI) (%)  | N     | Cases vacc | Cases unvacc | Controls vacc | Controls unvacc |
|------------------------------------------|-------------------------------|-------------------|-------|------------|--------------|---------------|-----------------|
| <b>September 2022–August 2023</b>        |                               |                   |       |            |              |               |                 |
| <b>Seasonal</b>                          | 14–89                         | 27 (11 to 40)     | 6,518 | 168        | 970          | 1,381         | 3,999           |
|                                          | 90–179                        | 15 (-5 to 32)     | 6,273 | 174        | 970          | 1,130         | 3,999           |
|                                          | 180–269                       | -16 (-48 to 8)    | 5,670 | 187        | 970          | 514           | 3,999           |
|                                          | 270–359                       | -74 (-172 to -12) | 5,107 | 72         | 970          | 66            | 3,999           |
| <b>Relative</b>                          | 14–89                         | 28 (12 to 41)     | 6,155 | 168        | 875          | 1,381         | 3,731           |
|                                          | 90–179                        | 15 (-6 to 32)     | 5,910 | 174        | 875          | 1,130         | 3,731           |
|                                          | 180–269                       | -16 (-49 to 9)    | 5,307 | 187        | 875          | 514           | 3,731           |
|                                          | 270–359                       | -64 (-160 to -4)  | 4,744 | 72         | 875          | 66            | 3,731           |
| <b>Relative (2<sup>nd</sup> booster)</b> | 14–89                         | 32 (15 to 45)     | 5,067 | 149        | 715          | 1,228         | 2,975           |
|                                          | 90–179                        | 22 (0 to 38)      | 4,865 | 151        | 715          | 1,024         | 2,975           |
|                                          | 180–269                       | -8 (-41 to 17)    | 4,355 | 179        | 715          | 486           | 2,975           |
|                                          | 270–359                       | -39 (-128 to 15)  | 3,825 | 71         | 715          | 64            | 2,975           |
| <b>XBB-dominant</b>                      |                               |                   |       |            |              |               |                 |
| <b>Seasonal</b>                          | 14–89                         | 44 (-10 to 75)    | 1,396 | 9          | 286          | 81            | 1,020           |
|                                          | 90–179                        | 22 (-1 to 40)     | 2,152 | 133        | 286          | 713           | 1,020           |
|                                          | 180–269                       | -23 (-59 to 4)    | 2,000 | 186        | 286          | 508           | 1,020           |
|                                          | 270–359                       | -92 (-207 to -21) | 1,444 | 72         | 286          | 66            | 1,020           |
| <b>Relative</b>                          | 14–89                         | 41 (-17 to 74)    | 1,261 | 9          | 252          | 81            | 919             |
|                                          | 90–179                        | 21 (-3 to 40)     | 2,017 | 133        | 252          | 713           | 919             |
|                                          | 180–269                       | -24 (-61 to 4)    | 1,865 | 186        | 252          | 508           | 919             |
|                                          | 270–359                       | -81 (-192 to -12) | 1,309 | 72         | 252          | 66            | 919             |
| <b>Relative (2<sup>nd</sup> booster)</b> | 14–89                         | 46 (-12 to 77)    | 931   | 8          | 197          | 72            | 654             |
|                                          | 90–179                        | 27 (2 to 46)      | 1,613 | 117        | 197          | 645           | 654             |
|                                          | 180–269                       | -16 (-53 to 12)   | 1,494 | 174        | 197          | 469           | 654             |
|                                          | 270–359                       | -60 (-169 to 4)   | 986   | 71         | 197          | 64            | 654             |

CI: confidence interval; CVE: COVID-19 vaccine effectiveness; unvacc: unvaccinated; vacc: vaccinated. All models are adjusted by age, sex, onset date, presence of commonly collected chronic conditions and study site.
