# Supplementary material for: COVID-19 Vaccine Effectiveness in Autumn and Winter 2022 to 2023 Among Older Europeans
Source: PubMed Central journal article supplement (PMC11217869; doi:10.1001/jamanetworkopen.2024.19258), 2024-07-01
Supplement: jamanetwopen-e2419258-s002.pdf [file jamanetwopen-e2419258-s002.pdf]

\*First name, last name, and suffix (if applicable) are required and will appear in PubMed.

| <b>*Group Name(s): VEBIS Primary Care Vaccine Effectiveness Group</b> |                   |                              |                         |                                                                                                                                                |                                                 |                                                                |                                                                                                   |
|-----------------------------------------------------------------------|-------------------|------------------------------|-------------------------|------------------------------------------------------------------------------------------------------------------------------------------------|-------------------------------------------------|----------------------------------------------------------------|---------------------------------------------------------------------------------------------------|
| <b>*First Name and Middle Initial(s)</b>                              | <b>*Last Name</b> | <b>*Suffix (eg, Jr, III)</b> | <b>Academic Degrees</b> | <b>Institution</b>                                                                                                                             | <b>Location (city, state/province, country)</b> | <b>Role or Contribution, eg, chair, principal investigator</b> | <b>Group (if more than 1 Group listed in the byline) and/or Subgroup (eg, Steering Committee)</b> |
| Virtudes                                                              | Gallardo García   |                              |                         | Servicio de Vigilancia y Salud Laboral, Dirección General de Salud Pública y Ordenación Farmacéutica, Consejería de Salud y Consumo, Andalucía | Spain                                           |                                                                |                                                                                                   |
| Esteban                                                               | Perez Morilla     |                              |                         | Servicio de Vigilancia y Salud Laboral, Dirección General de Salud Pública y Ordenación Farmacéutica, Consejería de Salud y Consumo, Andalucía | Spain                                           |                                                                |                                                                                                   |
| Irene                                                                 | Pedrosa Corral    |                              |                         | Servicio de Microbiología, Hospital Universitario Virgen de las Nieves, Granada                                                                | Spain                                           |                                                                |                                                                                                   |
| Miriam                                                                | García Vázquez    |                              |                         | Vigilancia Epidemiológica, Dirección General de Salud Pública, Departamento de Sanidad, Gobierno de Aragón                                     | Spain                                           |                                                                |                                                                                                   |
| Ana                                                                   | Milagro-Beamonte  |                              |                         | Laboratorio de Microbiología, Hospital Universitario Miguel Servet, Zaragoza. IIS Aragón, Zaragoza                                             | Spain                                           |                                                                |                                                                                                   |
| Ana                                                                   | Fernandez Ibañez  |                              |                         | Consejeria de Salud-Principado de Asturias                                                                                                     | Spain                                           |                                                                |                                                                                                   |
| Mario                                                                 | Margolles Martins |                              |                         | Consejeria de Salud-Principado de Asturias; Instituto Investigación Principado de Asturias (ISPA)                                              | Spain                                           |                                                                |                                                                                                   |
| Jaume                                                                 | Giménez Duran     |                              |                         | Servicio de epidemiologia de la DG de Salud Pública de Baleares                                                                                | Spain                                           |                                                                |                                                                                                   |

## Supplemental Online Content: Nonauthor Collaborators

\*First name, last name, and suffix (if applicable) are required and will appear in PubMed.

| *First Name and Middle Initial(s) | *Last Name       | *Suffix (eg, Jr, III) | Academic Degrees | Institution                                                                                                                                               | Location (city, state/province, country) | Role or Contribution, eg, chair, principal investigator | Group (if more than 1 Group listed in the byline) and/or Subgroup (eg, Steering Committee) |
|-----------------------------------|------------------|-----------------------|------------------|-----------------------------------------------------------------------------------------------------------------------------------------------------------|------------------------------------------|---------------------------------------------------------|--------------------------------------------------------------------------------------------|
| Bartolomé                         | Sastre Palou     |                       |                  | Servicio de epidemiología de la DG de Salud Pública de Baleares                                                                                           | Spain                                    |                                                         |                                                                                            |
| Carla                             | López Causapé    |                       |                  | Servicio de Microbiología, Hospital Universitario Son Espases, Palma                                                                                      | Spain                                    |                                                         |                                                                                            |
| Luis Javier                       | Viloria Raymundo |                       |                  | Vigilancia Epidemiológica. Dirección General de Salud Pública, Cantabria                                                                                  | Spain                                    |                                                         |                                                                                            |
| Tomás                             | Vega Alonso      |                       |                  | Dirección General de Salud Pública, Junta de Castilla y León                                                                                              | Spain                                    |                                                         |                                                                                            |
| Ana                               | Ordax Díez       |                       |                  | Dirección General de Salud Pública, Junta de Castilla y León                                                                                              | Spain                                    |                                                         |                                                                                            |
| Jose Eugenio                      | Lozano Alonso    |                       |                  | Dirección General de Salud Pública, Junta de Castilla y León                                                                                              | Spain                                    |                                                         |                                                                                            |
| Silvia                            | Rojo Bello       |                       |                  | Servicio de Microbiología, Hospital Clínico Universitario de Valladolid                                                                                   | Spain                                    |                                                         |                                                                                            |
| Jacobo                            | Mendioroz        |                       |                  | Sub-Directorate General of Surveillance and Response to Public Health Emergencies, Public Health Agency of Catalonia, Generalitat of Catalonia, Barcelona | Spain                                    |                                                         |                                                                                            |
| Luca                              | Basile           |                       |                  | Sub-Directorate General of Surveillance and Response to Public Health Emergencies, Public Health Agency of Catalonia, Generalitat of Catalonia, Barcelona | Spain                                    |                                                         |                                                                                            |

## Supplemental Online Content: Nonauthor Collaborators

\*First name, last name, and suffix (if applicable) are required and will appear in PubMed.

| *First Name and Middle Initial(s) | *Last Name     | *Suffix (eg, Jr, III) | Academic Degrees | Institution                                                                                                                                               | Location (city, state/province, country) | Role or Contribution, eg, chair, principal investigator | Group (if more than 1 Group listed in the byline) and/or Subgroup (eg, Steering Committee) |
|-----------------------------------|----------------|-----------------------|------------------|-----------------------------------------------------------------------------------------------------------------------------------------------------------|------------------------------------------|---------------------------------------------------------|--------------------------------------------------------------------------------------------|
| Ana Isabel                        | Martínez Mateo |                       |                  | Sub-Directorate General of Surveillance and Response to Public Health Emergencies, Public Health Agency of Catalonia, Generalitat of Catalonia, Barcelona | Spain                                    |                                                         |                                                                                            |
| Carlota                           | Ruiz de Porras |                       |                  | Sub-Directorate General of Surveillance and Response to Public Health Emergencies, Public Health Agency of Catalonia, Generalitat of Catalonia, Barcelona | Spain                                    |                                                         |                                                                                            |
| Alba                              | Moya Garcés    |                       |                  | Sub-Directorate General of Surveillance and Response to Public Health Emergencies, Public Health Agency of Catalonia, Generalitat of Catalonia, Barcelona | Spain                                    |                                                         |                                                                                            |
| M <sup>a</sup> Ángeles            | Marcos         |                       |                  | Laboratorio de Microbiología, Hospital Clínic de Barcelona                                                                                                | Spain                                    |                                                         |                                                                                            |
| Aurora                            | López Maside   |                       |                  | Subdirección General de Epidemiología y Vigilancia de la Salud, Valencia                                                                                  | Spain                                    |                                                         |                                                                                            |
| Francesc                          | Botella Quijal |                       |                  | Subdirección General de Epidemiología y Vigilancia de la Salud, Valencia                                                                                  | Spain                                    |                                                         |                                                                                            |
| Maite                             | Miralles Espi  |                       |                  | Subdirección General de Epidemiología y Vigilancia de la Salud, Valencia                                                                                  | Spain                                    |                                                         |                                                                                            |

## Supplemental Online Content: Nonauthor Collaborators

\*First name, last name, and suffix (if applicable) are required and will appear in PubMed.

| *First Name and Middle Initial(s) | *Last Name       | *Suffix (eg, Jr, III) | Academic Degrees | Institution                                                                                                     | Location (city, state/province, country) | Role or Contribution, eg, chair, principal investigator | Group (if more than 1 Group listed in the byline) and/or Subgroup (eg, Steering Committee) |
|-----------------------------------|------------------|-----------------------|------------------|-----------------------------------------------------------------------------------------------------------------|------------------------------------------|---------------------------------------------------------|--------------------------------------------------------------------------------------------|
| Cristina                          | Andreu Salete    |                       |                  | Subdirección de Epidemiología.<br>Dirección General de Salud Pública.<br>Servicio Extremeño de Salud,<br>Mérida | Spain                                    |                                                         |                                                                                            |
| María del Carmen                  | García Rodríguez |                       |                  | Subdirección de Epidemiología.<br>Dirección General de Salud Pública.<br>Servicio Extremeño de Salud,<br>Mérida | Spain                                    |                                                         |                                                                                            |
| Juan Antonio                      | Linares          |                       |                  | Subdirección de Epidemiología.<br>Dirección General de Salud Pública.<br>Servicio Extremeño de Salud,<br>Mérida | Spain                                    |                                                         |                                                                                            |
| Luis                              | García Comas     |                       |                  | Subdirección General de Vigilancia<br>en Salud Pública, Madrid                                                  | Spain                                    |                                                         |                                                                                            |
| M <sup>a</sup> Isabel             | Barranco         |                       |                  | Servicio de Epidemiología, Sección<br>de Vigilancia Epidemiológica,<br>Consejería de Salud de Murcia            | Spain                                    |                                                         |                                                                                            |
| María-Dolores                     | Chirlaque        |                       |                  | Servicio de Epidemiología, Sección<br>de Vigilancia Epidemiológica,<br>Consejería de Salud de Murcia            | Spain                                    |                                                         |                                                                                            |
| Antonio                           | Moreno Docón     |                       |                  | Servicio de Microbiología, Hospital<br>Clínico Universitario Virgen de<br>Arrixaca                              | Spain                                    |                                                         |                                                                                            |
| Violeta                           | Ramos Marín      |                       |                  | Servicio de Vigilancia<br>Epidemiológica de la Consejería de<br>Sanidad y Servicios Sociales de<br>Ceuta        | Spain                                    |                                                         |                                                                                            |

## Supplemental Online Content: Nonauthor Collaborators

\*First name, last name, and suffix (if applicable) are required and will appear in PubMed.

| *First Name and Middle Initial(s) | *Last Name     | *Suffix (eg, Jr, III) | Academic Degrees | Institution                                                                                                                | Location (city, state/province, country) | Role or Contribution, eg, chair, principal investigator | Group (if more than 1 Group listed in the byline) and/or Subgroup (eg, Steering Committee) |
|-----------------------------------|----------------|-----------------------|------------------|----------------------------------------------------------------------------------------------------------------------------|------------------------------------------|---------------------------------------------------------|--------------------------------------------------------------------------------------------|
| Daniel                            | Castrillejo    |                       |                  | Servicio de Epidemiología, Dirección General de Salud Pública, Consejería de Políticas Sociales y Salud Pública de Melilla | Spain                                    |                                                         |                                                                                            |
| Atanasio                          | Gómez Anés     |                       |                  | Servicio de Epidemiología, Dirección General de Salud Pública, Consejería de Políticas Sociales y Salud Pública de Melilla | Spain                                    |                                                         |                                                                                            |
| Amparo                            | Larrauro       |                       |                  | Centro Nacional de Epidemiología, Instituto de Salud Carlos III, Madrid                                                    | Spain                                    |                                                         |                                                                                            |
| Gloria                            | Pérez-Gimeno   |                       |                  | Centro Nacional de Epidemiología, Instituto de Salud Carlos III, Madrid                                                    | Spain                                    |                                                         |                                                                                            |
| Marcos                            | Lozano Álvarez |                       |                  | Centro Nacional de Epidemiología, Instituto de Salud Carlos III, Madrid                                                    | Spain                                    |                                                         |                                                                                            |
| Lorena                            | Vega           |                       |                  | Centro Nacional de Epidemiología, Instituto de Salud Carlos III, Madrid                                                    | Spain                                    |                                                         |                                                                                            |
| Silvia                            | Galindo        |                       |                  | Centro Nacional de Epidemiología, Instituto de Salud Carlos III, Madrid                                                    | Spain                                    |                                                         |                                                                                            |
| Tania                             | Puma           |                       |                  | Centro Nacional de Epidemiología, Instituto de Salud Carlos III, Madrid                                                    | Spain                                    |                                                         |                                                                                            |
| Susana                            | Monge          |                       |                  | Centro Nacional de Epidemiología, Instituto de Salud Carlos III, Madrid                                                    | Spain                                    |                                                         |                                                                                            |

## Supplemental Online Content: Nonauthor Collaborators

\*First name, last name, and suffix (if applicable) are required and will appear in PubMed.

| *First Name and Middle Initial(s) | *Last Name        | *Suffix (eg, Jr, III) | Academic Degrees | Institution                                                             | Location (city, state/province, country) | Role or Contribution, eg, chair, principal investigator | Group (if more than 1 Group listed in the byline) and/or Subgroup (eg, Steering Committee) |
|-----------------------------------|-------------------|-----------------------|------------------|-------------------------------------------------------------------------|------------------------------------------|---------------------------------------------------------|--------------------------------------------------------------------------------------------|
| Francisco                         | Pozo              |                       |                  | Centro Nacional de Microbiología, Instituto de Salud Carlos III, Madrid | Spain                                    |                                                         |                                                                                            |
| Inmaculada                        | Casas             |                       |                  | Centro Nacional de Microbiología, Instituto de Salud Carlos III, Madrid | Spain                                    |                                                         |                                                                                            |
| Virginia                          | Sandonis          |                       |                  | Centro Nacional de Microbiología, Instituto de Salud Carlos III, Madrid | Spain                                    |                                                         |                                                                                            |
| Sonia                             | Vázquez-Morón     |                       |                  | Centro Nacional de Microbiología, Instituto de Salud Carlos III, Madrid | Spain                                    |                                                         |                                                                                            |
| Aitziber                          | Echeverría        |                       | PhD              | Instituto de Salud Pública de Navarra - IdiSNA - CIBERESP               | Navarre, Spain                           |                                                         |                                                                                            |
| Camino                            | Trobajo-Sanmartín |                       | PhD              | Instituto de Salud Pública de Navarra - IdiSNA - CIBERESP               | Navarre, Spain                           |                                                         |                                                                                            |
| Manuel                            | García Cenoz      |                       | MD, PhD          | Instituto de Salud Pública de Navarra - IdiSNA - CIBERESP               | Navarre, Spain                           |                                                         |                                                                                            |
| Guillermo                         | Ezpeleta          |                       | MD               | Instituto de Salud Pública de Navarra - IdiSNA - CIBERESP               | Navarre, Spain                           |                                                         |                                                                                            |
| Carmen                            | Ezpeleta          |                       | MD               | Hospital Universitario de Navarra - IdiSNA                              | Navarre, Spain                           |                                                         |                                                                                            |
| Ana                               | Navascués         |                       | MD               | Hospital Universitario de Navarra - IdiSNA                              | Navarre, Spain                           |                                                         |                                                                                            |
| Katalin                           | Krisztalovics     |                       |                  | Semmelweis University                                                   | Hungary                                  |                                                         |                                                                                            |
| Krisztina                         | Mucsányiné Juhász |                       |                  | Semmelweis University                                                   | Hungary                                  |                                                         |                                                                                            |
| Katalin                           | Kristóf           |                       |                  | Semmelweis University                                                   | Hungary                                  |                                                         |                                                                                            |
| Ute                               | Preuss            |                       |                  | Robert Koch Institut                                                    | Germany                                  |                                                         |                                                                                            |
| Marianne                          | Wedde             |                       |                  | Robert Koch Institut                                                    | Germany                                  |                                                         |                                                                                            |
| Barbara                           | Biere             |                       |                  | Robert Koch Institut                                                    | Germany                                  |                                                         |                                                                                            |
| Janine                            | Reiche            |                       |                  | Robert Koch Institut                                                    | Germany                                  |                                                         |                                                                                            |
| Djin-Ye                           | Oh                |                       |                  | Robert Koch Institut                                                    | Germany                                  |                                                         |                                                                                            |
| Adele                             | McKenna           |                       |                  | Health Protection Surveillance Centre                                   | Ireland                                  |                                                         |                                                                                            |

## Supplemental Online Content: Nonauthor Collaborators

\*First name, last name, and suffix (if applicable) are required and will appear in PubMed.

| *First Name and Middle Initial(s) | *Last Name            | *Suffix (eg, Jr, III) | Academic Degrees | Institution                                                     | Location (city, state/province, country) | Role or Contribution, eg, chair, principal investigator | Group (if more than 1 Group listed in the byline) and/or Subgroup (eg, Steering Committee) |
|-----------------------------------|-----------------------|-----------------------|------------------|-----------------------------------------------------------------|------------------------------------------|---------------------------------------------------------|--------------------------------------------------------------------------------------------|
| Jeff                              | Connell               |                       |                  | University College Dublin                                       | Ireland                                  |                                                         |                                                                                            |
| Michael                           | Joyce                 |                       |                  |                                                                 | Ireland                                  |                                                         |                                                                                            |
| Mariam                            | Bagheri               |                       |                  | National Institute for Public Health and the Environment (RIVM) | Netherlands                              |                                                         |                                                                                            |
| Sanne                             | Bos                   |                       |                  | National Institute for Public Health and the Environment (RIVM) | Netherlands                              |                                                         |                                                                                            |
| Sharon                            | van den Brink         |                       |                  | National Institute for Public Health and the Environment (RIVM) | Netherlands                              |                                                         |                                                                                            |
| Frederika                         | Dijkstra              |                       |                  | National Institute for Public Health and the Environment (RIVM) | Netherlands                              |                                                         |                                                                                            |
| Dirk                              | Eggink                |                       |                  | National Institute for Public Health and the Environment (RIVM) | Netherlands                              |                                                         |                                                                                            |
| Rianne                            | van Gageldonk-Lafeber |                       |                  | the Environment (RIVM)                                          | Netherlands                              |                                                         |                                                                                            |
| Gabriel                           | Goderski              |                       |                  | National Institute for Public Health and the Environment (RIVM) | Netherlands                              |                                                         |                                                                                            |
| Chantal                           | Herrebrugh            |                       |                  | National Institute for Public Health and the Environment (RIVM) | Netherlands                              |                                                         |                                                                                            |
| Liz                               | Jenniskens            |                       |                  | National Institute for Public Health and the Environment (RIVM) | Netherlands                              |                                                         |                                                                                            |
| Daphne                            | Reukers               |                       |                  | National Institute for Public Health and the Environment (RIVM) | Netherlands                              |                                                         |                                                                                            |
| John                              | Sluimer               |                       |                  | National Institute for Public Health and the Environment (RIVM) | Netherlands                              |                                                         |                                                                                            |
| Tara                              | Sprong                |                       |                  | National Institute for Public Health and the Environment (RIVM) | Netherlands                              |                                                         |                                                                                            |
| Anne                              | Teirlinck             |                       |                  | National Institute for Public Health and the Environment (RIVM) | Netherlands                              |                                                         |                                                                                            |
| Nienke                            | Veldhijzen            |                       |                  | Nivel Netherlands Institute for Health Services Research        | Netherlands                              |                                                         |                                                                                            |
| Ruben                             | van der Burgh         |                       |                  | Nivel Netherlands Institute for Health Services Research        | Netherlands                              |                                                         |                                                                                            |
| Cathrien                          | Kager                 |                       |                  | Nivel Netherlands Institute for Health Services Research        | Netherlands                              |                                                         |                                                                                            |
| Mayra                             | Klinkhamer            |                       |                  | Nivel Netherlands Institute for Health Services Research        | Netherlands                              |                                                         |                                                                                            |
| Bart                              | Knottnerus            |                       |                  | Nivel Netherlands Institute for Health Services Research        | Netherlands                              |                                                         |                                                                                            |
| Marloes                           | Riethof               |                       |                  | Nivel Netherlands Institute for Health Services Research        | Netherlands                              |                                                         |                                                                                            |

## Supplemental Online Content: Nonauthor Collaborators

\*First name, last name, and suffix (if applicable) are required and will appear in PubMed.

| *First Name and Middle Initial(s) | *Last Name       | *Suffix (eg, Jr, III) | Academic Degrees | Institution                                              | Location (city, state/province, country) | Role or Contribution, eg, chair, principal investigator | Group (if more than 1 Group listed in the byline) and/or Subgroup (eg, Steering Committee) |
|-----------------------------------|------------------|-----------------------|------------------|----------------------------------------------------------|------------------------------------------|---------------------------------------------------------|--------------------------------------------------------------------------------------------|
| Ruud                              | van den Broek    |                       |                  | Nivel Netherlands Institute for Health Services Research | Netherlands                              |                                                         |                                                                                            |
| Safira                            | Wortel           |                       |                  | Nivel Netherlands Institute for Health Services Research | Netherlands                              |                                                         |                                                                                            |
| Ausenda                           | Machado          |                       |                  | National Institute of Health Doutor Ricardo Jorge        | Portugal                                 |                                                         |                                                                                            |
| Irina                             | Kislaya          |                       |                  | National Institute of Health Doutor Ricardo Jorge        | Portugal                                 |                                                         |                                                                                            |
| Carlos                            | Aniceto          |                       |                  | National Institute of Health Doutor Ricardo Jorge        | Portugal                                 |                                                         |                                                                                            |
| Licinia                           | Gomes            |                       |                  | National Institute of Health Doutor Ricardo Jorge        | Portugal                                 |                                                         |                                                                                            |
| Nuno                              | Verdasca         |                       |                  | National Institute of Health Doutor Ricardo Jorge        | Portugal                                 |                                                         |                                                                                            |
| Camila                            | Henriques        |                       |                  | National Institute of Health Doutor Ricardo Jorge        | Portugal                                 |                                                         |                                                                                            |
| Daniela                           | Dias             |                       |                  | National Institute of Health Doutor Ricardo Jorge        | Portugal                                 |                                                         |                                                                                            |
| Miguel                            | Lança            |                       |                  | National Institute of Health Doutor Ricardo Jorge        | Portugal                                 |                                                         |                                                                                            |
| Thierry                           | Blanchon         |                       |                  |                                                          | France                                   |                                                         |                                                                                            |
| Caroline                          | Guerrisi         |                       |                  |                                                          | France                                   |                                                         |                                                                                            |
| Aubane                            | Renard           |                       |                  |                                                          | France                                   |                                                         |                                                                                            |
| Titouan                           | Launay           |                       |                  |                                                          | France                                   |                                                         |                                                                                            |
| Shirley                           | Masse            |                       |                  |                                                          | France                                   |                                                         |                                                                                            |
| Marie                             | Chazelle         |                       |                  |                                                          | France                                   |                                                         |                                                                                            |
| Ivana                             | Ferenčak         |                       |                  |                                                          | Croatia                                  |                                                         |                                                                                            |
| Bernard                           | Kaić             |                       |                  |                                                          | Croatia                                  |                                                         |                                                                                            |
| Vesna                             | Višekruna Vučina |                       |                  |                                                          | Croatia                                  |                                                         |                                                                                            |
| Katica                            | Čusek Adamić     |                       |                  |                                                          | Croatia                                  |                                                         |                                                                                            |
| Mirjana Lana                      | Kosanović Ličina |                       |                  |                                                          | Croatia                                  |                                                         |                                                                                            |
| Danijela                          | Lakošeljac       |                       |                  |                                                          | Croatia                                  |                                                         |                                                                                            |
| Ivana                             | Mihin Huskić     |                       |                  |                                                          | Croatia                                  |                                                         |                                                                                            |
| Diana                             | Nonković         |                       |                  |                                                          | Croatia                                  |                                                         |                                                                                            |



## Supplemental Online Content: Nonauthor Collaborators

\*First name, last name, and suffix (if applicable) are required and will appear in PubMed.

| *First Name and Middle Initial(s) | *Last Name        | *Suffix (eg, Jr, III) | Academic Degrees | Institution | Location (city, state/province, country) | Role or Contribution, eg, chair, principal investigator | Group (if more than 1 Group listed in the byline) and/or Subgroup (eg, Steering Committee) |
|-----------------------------------|-------------------|-----------------------|------------------|-------------|------------------------------------------|---------------------------------------------------------|--------------------------------------------------------------------------------------------|
| Annasara                          | Carnahan          |                       |                  |             | Sweden                                   |                                                         |                                                                                            |
| Eva                               | Hansson-Pihlainen |                       |                  |             | Sweden                                   |                                                         |                                                                                            |
| Elin                              | Arvesen           |                       |                  |             | Sweden                                   |                                                         |                                                                                            |
| Nora                              | Nid               |                       |                  |             | Sweden                                   |                                                         |                                                                                            |
| Anna-Lena                         | Hansen            |                       |                  |             | Sweden                                   |                                                         |                                                                                            |
| Emmi                              | Andersson         |                       |                  |             | Sweden                                   |                                                         |                                                                                            |
| Lena                              | Dillner           |                       |                  |             | Sweden                                   |                                                         |                                                                                            |
| Adrian                            | Jidovu            |                       |                  |             | Romania                                  |                                                         |                                                                                            |
| Olivia Carmen                     | Timnea            |                       |                  |             | Romania                                  |                                                         |                                                                                            |
| Cătălina                          | Pascu             |                       |                  |             | Romania                                  |                                                         |                                                                                            |
| Mihaela                           | Oprea             |                       |                  |             | Romania                                  |                                                         |                                                                                            |
| Iulia                             | Bistriceanu       |                       |                  |             | Romania                                  |                                                         |                                                                                            |
| Alina                             | Ivanciuc          |                       |                  |             | Romania                                  |                                                         |                                                                                            |
| Maria Elena                       | Mihai             |                       |                  |             | Romania                                  |                                                         |                                                                                            |
