# Supplementary material for: COVID-19 Vaccine Effectiveness in Autumn and Winter 2022 to 2023 Among Older Europeans
Source: JAMA Netw Open. 2024 Jul 1;7(7):e2419258. doi: 10.1001/jamanetworkopen.2024.19258 (PMC11217869; doi:10.1001/jamanetworkopen.2024.19258)
Supplement: Supplement 3. — Data Sharing Statement [file jamanetwopen-e2419258-s003.pdf]

## Data Sharing Statement

Laniece Delaunay. COVID-19 Vaccine Effectiveness in Autumn and Winter 2022 to 2023 Among Older Europeans. *JAMA Netw Open*. Published July 01, 2024.  
doi:10.1001/jamanetworkopen.2024.19258

### Data

**Data available:** Yes

**Data types:** Other (please specify)

**Additional Information:** Aggregate data

**How to access data:** Aggregate data available on request ([e.kissling@epiconcept.fr](mailto:e.kissling@epiconcept.fr)).

**When available:** With publication

### Supporting Documents

**Document types:** None

### Additional Information

**Who can access the data:** Researchers whose proposed use of the data has been approved

**Types of analyses:** For public health purposes.

**Mechanisms of data availability:** After approval of a proposal
